# Supplementary material for: ACPA and RF as predictors of sustained clinical remission in patients with rheumatoid arthritis: data from the Ontario Best practices Research Initiative (OBRI)
Source: PubMed Central journal article supplement — RMD Open. 2018 Nov 5;4(2):e000738. doi: 10.1136/rmdopen-2018-000738 (PMC6241994; doi:10.1136/rmdopen-2018-000738), 2018-11-05
Supplement: rmdopen-2018-000738supp001.pdf [file rmdopen-2018-000738supp001.pdf]

ACPA and RF, and sustained clinical remission - May 9, 2018

## Supplementary Information

**Figure S1: Example of sustained remission definition**

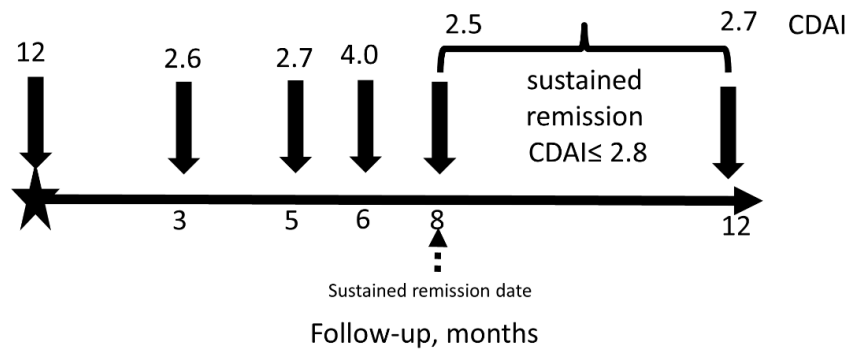

ACPA and RF, and sustained clinical remission - May 9, 2018

ACPA and RF, and sustained clinical remission - May 9, 2018

**Table S1: Association between ACPA/RF status at baseline and CDAI over time using GLMMs**

|                                            | Regression coefficients (standard error), <i>p</i> -value |                                  |                                  |                                  |
|--------------------------------------------|-----------------------------------------------------------|----------------------------------|----------------------------------|----------------------------------|
|                                            | Unadjusted model                                          | Adjusted models                  |                                  |                                  |
|                                            |                                                           | Model 1                          | Model 2                          | Model 3                          |
| <b>ACPA status at baseline</b>             |                                                           |                                  |                                  |                                  |
| - ACPA <sup>neg</sup> /RF <sup>neg</sup>   | Ref                                                       | Ref                              | Ref                              | Ref                              |
| - ACPA <sup>neg</sup> /RF <sup>pos</sup>   | -1.19 (1.01), 0.24                                        | 0.48 (0.73), 0.51                | 0.51 (0.71), 0.47                | 0.95 (0.75), 0.20                |
| - ACPA <sup>pos</sup> /RF <sup>neg</sup>   | <b>-2.96 (1.29), 0.02</b>                                 | -0.63 (0.94), 0.50               | -0.73 (0.90), 0.42               | -0.59 (0.96), 0.54               |
| - ACPA <sup>pos</sup> /RF <sup>pos</sup>   | <b>-2.73 (0.69), &lt;0.0001</b>                           | <b>-1.63 (0.50), 0.001</b>       | <b>-1.41 (0.49), 0.004</b>       | <b>-1.39 (0.51), 0.01</b>        |
| <b>Time (month)</b>                        | <b>-0.15 (0.01), &lt;0.0001</b>                           | <b>-0.15 (0.004), &lt;0.0001</b> | <b>-0.15 (0.004), &lt;0.0001</b> | <b>-0.13 (0.004), &lt;0.0001</b> |
| <b>Female</b>                              | 0.73 (0.70), 0.30                                         | <b>1.91 (0.51), 0.0002</b>       | <b>1.57 (0.50), 0.002</b>        | <b>1.64 (0.52), 0.002</b>        |
| <b>Age at baseline</b>                     | -0.02 (0.02), 0.34                                        | -0.02 (0.02), 0.23               | <b>-0.07 (0.02), &lt;0.0001</b>  | <b>-0.09 (0.02), &lt;0.0001</b>  |
| <b>CDAI at baseline</b>                    | <b>0.43 (0.02)</b>                                        | <b>0.43 (0.02), &lt;0.0001</b>   | <b>0.42 (0.02), &lt;0.0001</b>   | <b>0.42 (0.02), &lt;0.0001</b>   |
| <b>Number of comorbidities at baseline</b> | <b>0.67 (0.11), &lt;0.0001</b>                            | -                                | <b>0.70 (0.09), &lt;0.0001</b>   | <b>0.74 (0.10), &lt;0.0001</b>   |
| <b>Use of csDMARDs over time</b>           | 0.37 (0.23), 0.11                                         | -                                | -                                | -                                |
| <b>Number of csDMARDs over time</b>        | <b>0.84 (0.14), &lt;0.0001</b>                            | -                                | -                                | <b>-0.33 (0.13), 0.01</b>        |

Model 1: adjusted for age, sex, time, and CDAI at baseline

Model 2: adjusted for age, sex, time, CDAI at baseline, number of comorbidities at baseline,

Model 3: adjusted for age, sex, time, CDAI at baseline, number of comorbidities at baseline, and number of csDMARDs, use of bDMARDs, and use of oral steroids over time

ACPA: anti-citrullinated protein antibody; RF: rheumatoid factor; CDAI: clinical disease activity index; bDMARDs: biologic disease modifying antirheumatic drugs; csDMARDs: conventional synthetic disease modifying antirheumatic drugs

ACPA and RF, and sustained clinical remission - May 9, 2018

**Table S2: Association between ACPA/RF status at baseline and SDAI over time using GLMMs**

|                                              | Regression coefficients (standard error), <i>p</i> -value |                                  |                                  |                                  |
|----------------------------------------------|-----------------------------------------------------------|----------------------------------|----------------------------------|----------------------------------|
|                                              | Unadjusted model                                          | Adjusted models                  |                                  |                                  |
|                                              |                                                           | Model 1                          | Model 2                          | Model 3                          |
| <b>Anti-CCP status at baseline</b>           | Ref                                                       | Ref                              | Ref                              | Ref                              |
| - Anti-CCP <sup>neg</sup> /RF <sup>neg</sup> |                                                           |                                  |                                  |                                  |
| - Anti-CCP <sup>neg</sup> /RF <sup>pos</sup> | -1.41 (1.09), 0.20                                        | 0.42 (0.82), 0.61                | 0.35 (0.80), 0.66                | 0.97 (0.83), 0.25                |
| - Anti-CCP <sup>pos</sup> /RF <sup>neg</sup> | <b>-3.09 (1.39), 0.03</b>                                 | -0.42 (1.09), 0.70               | -0.49 (1.05), 0.64               | -0.36 (1.10), 0.74               |
| - Anti-CCP <sup>pos</sup> /RF <sup>pos</sup> | <b>-2.57 (0.74), 0.001</b>                                | <b>-1.45 (0.56), 0.01</b>        | <b>-1.20 (0.55), 0.03</b>        | <b>-1.16 (0.57), 0.04</b>        |
| <b>Time (month)</b>                          | <b>-0.15 (0.003), &lt;0.0001</b>                          | <b>-0.16 (0.004), &lt;0.0001</b> | <b>-0.16 (0.004), &lt;0.0001</b> | <b>-0.15 (0.004), &lt;0.0001</b> |
| <b>Female at baseline</b>                    | 0.42 (0.76), 0.58                                         | <b>1.82 (0.59), 0.002</b>        | 1.46 (0.60), 0.06                | <b>1.51 (0.59), 0.01</b>         |
| <b>Age at baseline</b>                       | -0.01 (0.02), 0.57                                        | -0.03 (0.02), 0.11               | <b>-0.09 (0.02), &lt;0.0001</b>  | <b>-0.10 (0.02), &lt;0.0001</b>  |
| <b>SDAI at baseline</b>                      | <b>0.43 (0.02), &lt;0.0001</b>                            | <b>0.43 (0.02), &lt;0.0001</b>   | <b>0.43 (0.02), &lt;0.0001</b>   | <b>0.43 (0.02), &lt;0.0001</b>   |
| <b>Number of comorbidities at baseline</b>   | <b>0.72 (0.12), &lt;0.0001</b>                            | -                                | <b>0.72 (0.12), &lt;0.0001</b>   | <b>0.82 (0.11), &lt;0.0001</b>   |
| <b>Use of csDMARDs over time</b>             | 0.13 (0.24), 0.59                                         | -                                | -                                | -                                |
| <b>Number of csDMARDs over time</b>          | <b>0.78 (0.14), &lt;0.0001</b>                            | -                                | -                                | <b>-0.47 (0.14), 0.001</b>       |
| <b>Use of bDMARDs over time</b>              | <b>-6.37 (0.24), &lt;0.0001</b>                           | -                                | -                                | <b>-4.32 (0.24), &lt;0.0001</b>  |
| <b>Use of oral steroids over time</b>        | <b>2.91 (0.30), &lt;0.0001</b>                            | -                                | -                                | <b>2.86 (0.28), &lt;0.0001</b>   |

Model 1: adjusted for age, sex, time, and SDAI at baseline

Model 2: adjusted for age, sex, time, SDAI at baseline, and number of comorbidities at baseline

Model 3: adjusted for age, sex, time, SDAI at baseline, and number of comorbidities at baseline, number of csDMARDs, use of bDMARDs, and use of oral steroids over time

ACPA: anti-citrullinated protein antibody; RF: rheumatoid factor; SDAI: simplified disease activity score; bDMARDs: biologic disease modifying antirheumatic drugs; csDMARDs: conventional synthetic disease modifying antirheumatic drugs

ACPA and RF, and sustained clinical remission - May 9, 2018

**Table S3: Association between ACPA/RF status at baseline and DAS28-ESR over time using GLMMs**

|                                              | Regression coefficients (standard error), <i>p</i> -value |                                |                                |                                  |
|----------------------------------------------|-----------------------------------------------------------|--------------------------------|--------------------------------|----------------------------------|
|                                              | Unadjusted model                                          | Adjusted models                |                                |                                  |
|                                              |                                                           | Model 1                        | Model 2                        | Model 3                          |
| <b>Anti-CCP status at baseline</b>           | Ref                                                       | Ref                            | Ref                            | Ref                              |
| - Anti-CCP <sup>neg</sup> /RF <sup>neg</sup> | 0.04 (0.14), 0.79                                         | 0.18 (0.10), 0.08              | 0.17 (0.10), 0.08              | <b>0.25 (0.10), 0.01</b>         |
| - Anti-CCP <sup>neg</sup> /RF <sup>pos</sup> | <b>-0.39 (0.18), 0.03</b>                                 | -0.11 (0.13), 0.39             | -0.13 (0.13), 0.31             | -0.10 (0.13), 0.50               |
| - Anti-CCP <sup>pos</sup> /RF <sup>neg</sup> | -0.10 (0.09), 0.31                                        | -0.02 (0.07), 0.77             | 0.01 (0.07), 0.92              | 0.03 (0.07), 0.70                |
| <b>Time (month)</b>                          | <b>-0.02 (0.0), &lt;0.0001</b>                            | <b>-0.02 (0.0), &lt;0.0001</b> | <b>-0.02 (0.0), &lt;0.0001</b> | <b>-0.02 (0.001), &lt;0.0001</b> |
| <b>Female</b>                                | 0.24 (0.10), <b>0.01</b>                                  | <b>0.29 (0.07), &lt;0.0001</b> | <b>0.25 (0.07), 0.003</b>      | <b>0.24 (0.07), 0.001</b>        |
| <b>Age at baseline</b>                       | 0.004 (0.003), 0.14                                       | 0.001 (0.002), 0.80            | <b>-0.01 (0.002), 0.01</b>     | <b>-0.01 (0.003), 0.0002</b>     |
| <b>DAS28-ESR at baseline</b>                 | <b>0.49 (0.02), &lt;0.0001</b>                            | <b>0.49 (0.02), &lt;0.0001</b> | <b>0.48 (0.02), &lt;0.0001</b> | <b>0.46 (0.02), &lt;0.0001</b>   |
| <b>Number of comorbidities at baseline</b>   | <b>0.11 (0.02), &lt;0.0001</b>                            | -                              | <b>0.09 (0.01), 0.0001</b>     | <b>0.10 (0.01), &lt;0.0001</b>   |
| <b>Use of csDMARDs over time</b>             | 0.02 (0.03), 0.47                                         | -                              | -                              | -                                |
| <b>Number of csDMARDs over time</b>          | <b>0.08 (0.02), &lt;0.0001</b>                            | -                              | -                              | <b>-0.09 (0.02), 0.001</b>       |
| <b>Use of bDMARDs over time</b>              | <b>-0.85 (0.03), &lt;0.0001</b>                           | -                              | -                              | <b>-0.61 (0.03), &lt;0.0001</b>  |
| <b>Use of oral steroids over time</b>        | <b>0.39 (0.04), &lt;0.0001</b>                            | -                              | -                              | <b>0.38 (0.03), &lt;0.0001</b>   |

Model 1: adjusted for age, sex, time, DAS28-ESR at baseline

Model 2: adjusted for age, sex, time, DAS28-ESR at baseline, and number of comorbidities at baseline

Model 3: adjusted for age, sex, time, DAS28-ESR at baseline, number of comorbidities at baseline, and number of csDMARDs, use of bDMARDs, and use of oral steroids over time

ACPA: anti-citrullinated protein antibody; RF: rheumatoid factor; DAS28-ESR: 28-joint disease activity score; bDMARDs: biologic disease modifying antirheumatic drugs; csDMARDs: conventional synthetic disease modifying antirheumatic drugs

ACPA and RF, and sustained clinical remission - May 9, 2018

**Table S4: Association between ACPA status at baseline and time to first sustained remission using Cox proportional hazards regression analysis**

|                                            | Hazard Ratio (95% Confidence Interval), <i>p</i> -value |                                     |                                     |                                     |
|--------------------------------------------|---------------------------------------------------------|-------------------------------------|-------------------------------------|-------------------------------------|
|                                            | Unadjusted model                                        | Adjusted models                     |                                     |                                     |
|                                            |                                                         | Model 1                             | Model 2                             | Model 3                             |
| <b>ACPA at baseline</b> <sup>‡</sup>       | Ref                                                     | Ref                                 | Ref                                 | Ref                                 |
| - ACPA <sup>neg</sup>                      |                                                         |                                     |                                     |                                     |
| - ACPA <sup>pos</sup>                      | <b>1.45 (1.15-1.82), 0.002</b>                          | <b>1.43 (1.08-1.89), 0.01</b>       | <b>1.41 (1.06-1.88), 0.02</b>       | <b>1.37 (1.03-1.81), 0.03</b>       |
| <b>RF status at baseline</b> <sup>‡</sup>  | Ref                                                     | Ref                                 | Ref                                 | Ref                                 |
| - RF <sup>neg</sup>                        |                                                         |                                     |                                     |                                     |
| - RF <sup>pos</sup>                        | 1.20 (0.95-1.52), 0.12                                  | 0.93 (0.70-1.24), 0.62              | 0.88 (0.66-1.18), 0.38              | 0.88 (0.66-1.17), 0.36              |
| <b>Female</b>                              | 0.96 (0.74-1.23), 0.73                                  | 0.79 (0.61-1.02), 0.07              | 0.85 (0.65-1.10), 0.20              | 0.85 (0.66-1.11), 0.24              |
| <b>Age at baseline</b>                     | <b>0.99 (0.98-1.00), 0.02</b>                           | 0.99 (0.99-1.01), 0.18              | 1.00 (0.99-1.01), 0.56              | 1.00 (0.99-1.01), 0.57              |
| <b>CDAI at baseline</b>                    | <b>0.97 (0.96-0.98), &lt;0.0001</b>                     | <b>0.98 (0.97-0.99), &lt;0.0001</b> | <b>0.98 (0.97-0.99), 0.0001</b>     | <b>0.99 (0.98-0.99), 0.002</b>      |
| <b>Number of comorbidities at baseline</b> | <b>0.87 (0.83-0.91), &lt;0.0001</b>                     | -                                   | <b>0.89 (0.84-0.93), &lt;0.0001</b> | <b>0.90 (0.85-0.94), &lt;0.0001</b> |
| <b>Use of csDMARDs over time</b>           | <b>2.85 (1.88-4.34), &lt;0.0001</b>                     | -                                   | -                                   | <b>2.84 (1.73-4.69), &lt;0.0001</b> |
| <b>Number of csDMARDs over time</b>        | <b>1.24 (1.11-1.40), 0.0003</b>                         | -                                   | -                                   | 0.97 (0.83-1.13), 0.69              |
| <b>Use of oral steroids over time</b>      | <b>0.58 (0.41-0.82), 0.002</b>                          | -                                   | -                                   | <b>0.64 (0.45-0.91), 0.01</b>       |

Model 1: adjusted for age, sex, RF status, and CDAI at baseline

Model 2: adjusted for age, sex, rheumatoid factor, CDAI at baseline, and number of comorbidities at baseline

Model 3: adjusted for age, sex, rheumatoid factor, CDAI at baseline, and number of comorbidities at baseline, use of csDMARDs, number of csDMARDs and use of oral steroids over time

<sup>‡</sup> Interaction between ACPA and RF in all models were checked and it was not significant

ACPA: anti-citrullinated protein antibody; RF: rheumatoid factor; CDAI: clinical disease activity index; bDMARDs: biologic disease modifying antirheumatic drugs; csDMARDs: conventional synthetic disease modifying antirheumatic drugs

ACPA and RF, and sustained clinical remission - May 9, 2018

Table S5: Association between ACPA status at baseline and CDAI over time

|                                             | Regression coefficients (standard error), <i>p</i> -value |                                  |                                  |                                  |
|---------------------------------------------|-----------------------------------------------------------|----------------------------------|----------------------------------|----------------------------------|
|                                             | Unadjusted model                                          | Adjusted models                  |                                  |                                  |
|                                             |                                                           | Model 1                          | Model 2                          | Model 3                          |
| <b>ACPA status at baseline</b> <sup>‡</sup> |                                                           |                                  |                                  |                                  |
| - ACPA <sup>neg</sup>                       | Ref                                                       | Ref                              | Ref                              | Ref                              |
| - ACPA <sup>pos</sup>                       | <b>-2.38 (0.60), &lt;0.0001</b>                           | <b>-1.61 (1.48), 0.003</b>       | <b>-1.51 (0.53), 0.004</b>       | <b>-1.75 (0.56), 0.002</b>       |
| <b>Time (month)</b>                         | <b>-0.18 (0.01), &lt;0.0001</b>                           | <b>-0.15 (0.004), &lt;0.0001</b> | <b>-0.15 (0.003), &lt;0.0001</b> | <b>-0.13 (0.004), &lt;0.0001</b> |
| <b>RF status at baseline</b> <sup>‡</sup>   |                                                           |                                  |                                  |                                  |
| - RF <sup>neg</sup>                         | Ref                                                       | Ref                              | Ref                              | Ref                              |
| - RF <sup>pos</sup>                         | <b>-1.88 (0.62), 0.003</b>                                | -0.12 (0.56), 0.83               | 0.02 (0.54), 0.97                | 0.24 (0.58), 0.68                |
| <b>Female at baseline</b>                   | 0.73 (0.70), 0.30                                         | <b>1.90 (0.51), 0.0002</b>       | <b>1.56 (0.50), 0.002</b>        | <b>1.63 (0.53), 0.002</b>        |
| <b>Age at baseline</b>                      | -0.01 (0.02), 0.66                                        | -0.02 (0.02), 0.24               | <b>-0.07 (0.02), &lt;0.0001</b>  | <b>-0.09 (0.02), &lt;0.0001</b>  |
| <b>CDAI at baseline</b>                     | <b>0.43 (0.02), &lt;0.0001</b>                            | <b>0.43 (0.02), &lt;0.0001</b>   | <b>0.42 (0.02), &lt;0.0001</b>   | <b>0.41 (0.02), &lt;0.0001</b>   |
| <b>Number of comorbidity at baseline</b>    | <b>0.58 (0.17), 0.001</b>                                 | -                                | <b>0.71 (0.09), &lt;0.0001</b>   | <b>0.74 (0.09), &lt;0.0001</b>   |
| <b>Use of csDMARDs over time</b>            | 0.02 (0.33), 0.94                                         | -                                | -                                | -                                |
| <b>Number of csDMARDs over time</b>         | <b>0.40 (0.19), 0.03</b>                                  | -                                | -                                | <b>-0.33 (0.13), 0.001</b>       |
| <b>Use of bDMARDs over time</b>             | <b>-7.36 (0.35), &lt;0.0001</b>                           | -                                | -                                | <b>-4.25 (0.22), &lt;0.0001</b>  |
| <b>Use of oral steroids over time</b>       | <b>4.16 (0.42), &lt;0.0001</b>                            | -                                | -                                | <b>2.74 (0.26), &lt;0.0001</b>   |

Model 1: adjusted for age, sex, RF status, time, and CDAI at baseline

Model 2: adjusted for age, sex, time, RF status, CDAI at baseline, and number of comorbidities at baseline

Model 3: adjusted for age, sex, time, RF status, CDAI at baseline, number of comorbidities at baseline, and number of csDMARDs, use of bDMARDs, and use of oral steroids over time

Fonts in bold show *p*-value <0.05<sup>‡</sup> Interaction between ACPA and RF in all models was checked and it was not significant
